# Supplementary material for: Stratification of Colorectal Patients Based on Survival Analysis Shows the Value of Consensus Molecular Subtypes and Reveals the CBLL1 Gene as a Biomarker of CMS2 Tumours
Source: MDPI journal article supplement (doi:10.3390/ijms25031919), 2024-02-05
Supplement: s1 [file s1]

### Expression for CBLL1 at each Stage (1,2,3,4)

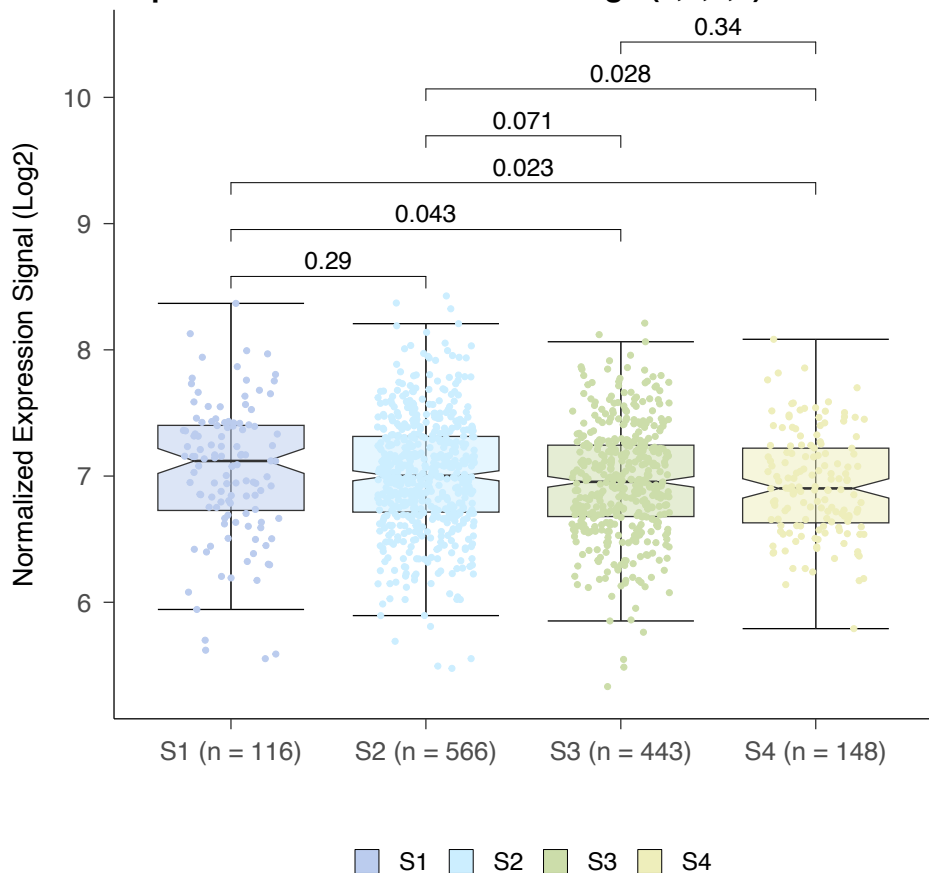

**Supplementary Figure S1.** Expression of the gene CBLL1 in a cohort of 1273 CRC tumours divided into different stages (from stage 1 to stage 4, S1-S4).
