# Supplementary material for: Stratification of Colorectal Patients Based on Survival Analysis Shows the Value of Consensus Molecular Subtypes and Reveals the CBLL1 Gene as a Biomarker of CMS2 Tumours
Source: MDPI journal article supplement (doi:10.3390/ijms25031919), 2024-02-05
Supplement: s1 [file s1]

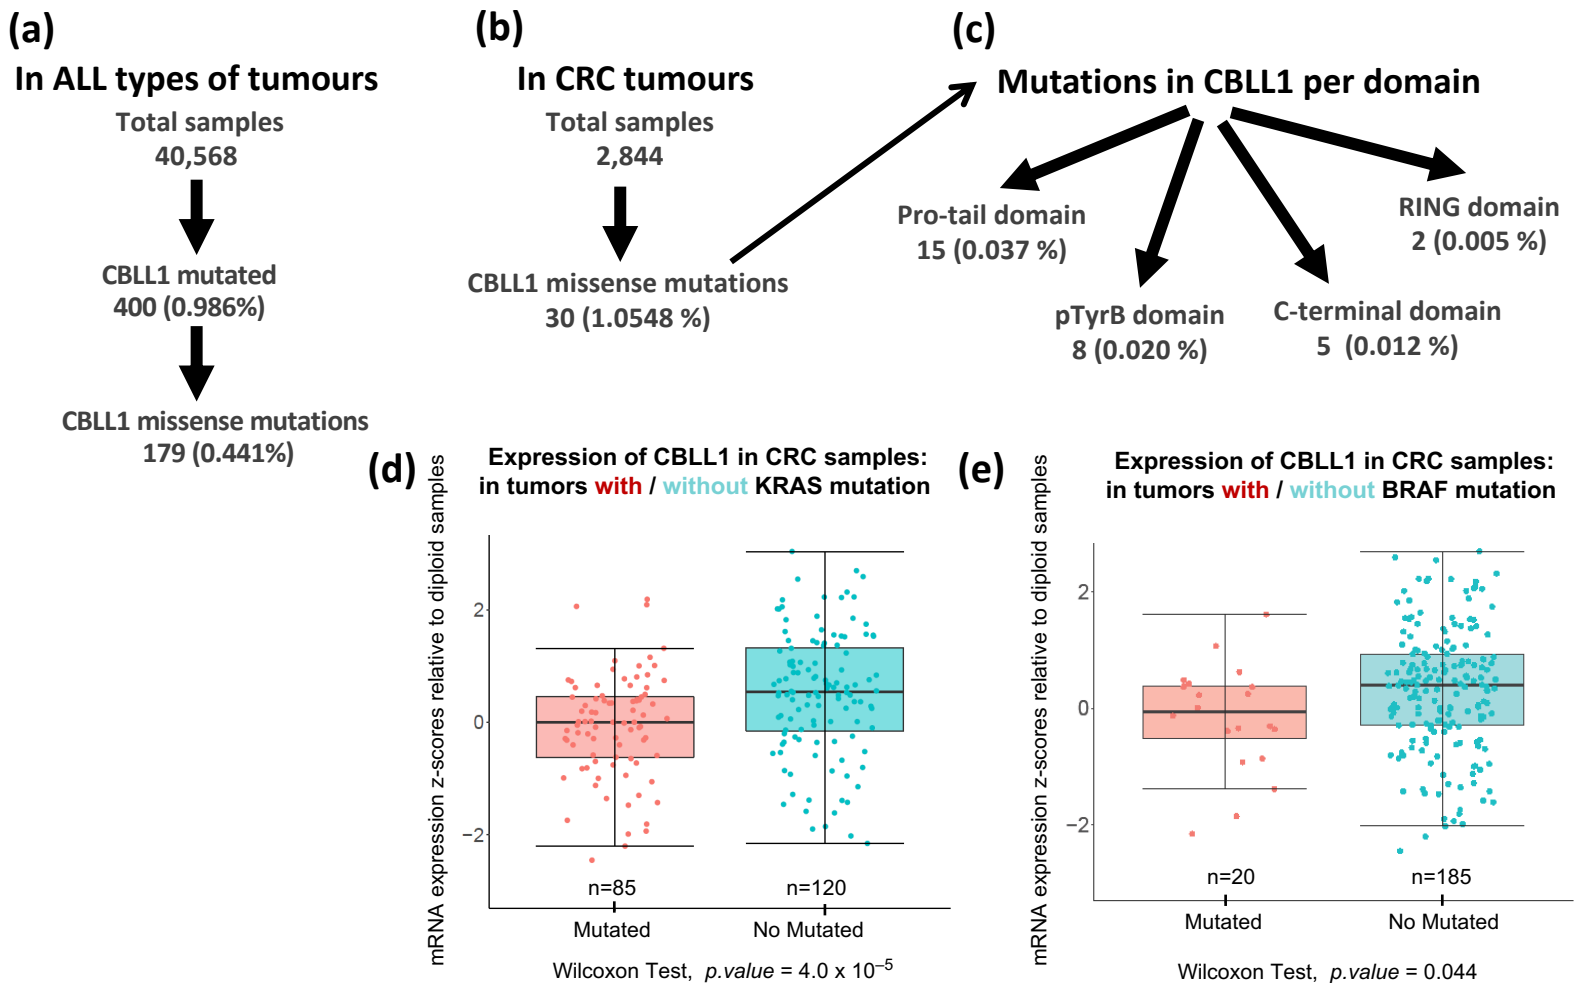

**Supplementary Figure S2.** Somatic mutations reported for the human gene CBLL1 (taken from COSMIC database, <https://cancer.sanger.ac.uk/cosmic>, accessed on 10 February 2023): **(a)** in all types of tumours; **(b)** in colorectal cancer tumours; **(c)** in colorectal cancer tumours within the different domains of the protein. Differences in the expression distribution of CBLL1 in CRC samples comparing the tumours with or without mutation **(d)** in KRAS, or **(e)** in BRAF.
